# Supplementary material for: COVID-19 Vaccine Hesitancy among Parents of Children and Adolescents Living in Brazil
Source: Vaccines (Basel). 2021 Sep 30;9(10):1115. doi: 10.3390/vaccines9101115 (PMC8540804; doi:10.3390/vaccines9101115)
Supplement: Supplementary file 1 [file vaccines-09-01115-s001.zip › vaccines-1378237-supplementary.pdf]

**Table S1.** Answers to the questionnaire about vaccinations.

| Questions                                                                                          | N (%) |        |
|----------------------------------------------------------------------------------------------------|-------|--------|
| Have you ever delayed having your child get a shot for reasons other than illness or allergy?      |       |        |
| Yes                                                                                                | 106   | (21)   |
| No                                                                                                 | 395   | (79)   |
| Have you ever decided not to have your child get a shot for reasons other than illness or allergy? |       |        |
| Yes                                                                                                | 25    | (5)    |
| No                                                                                                 | 474   | (95)   |
| Don't Know                                                                                         | 2     | (0.4)  |
| How sure are you that following the recommended shot schedule is a good idea for your child?       |       |        |
| 0 = Not at all sure                                                                                | 0     | (0)    |
| 1-5                                                                                                | 5     | (1)    |
| 6                                                                                                  | 3     | (0.6)  |
| 7                                                                                                  | 3     | (0.6)  |
| 8                                                                                                  | 24    | (4.8)  |
| 9                                                                                                  | 27    | (5.4)  |
| 10 = Completely sure                                                                               | 439   | (88)   |
| If you had another infant today, would you want him/her to get all the recommended shots?          |       |        |
| Yes                                                                                                | 497   | (99.2) |
| No                                                                                                 | 1     | (0.2)  |
| Don't Know                                                                                         | 3     | (0.6)  |
| Overall, how hesitant about childhood shots would you consider yourself to be?                     |       |        |
| 1 = Not at all hesitant                                                                            | 317   | (63)   |
| 2 = Not too hesitant                                                                               | 53    | (11)   |
| 3 = Not sure                                                                                       | 33    | (6.6)  |
| 4 = Somewhat hesitant                                                                              | 30    | (6)    |
| 5 = Very hesitant                                                                                  | 68    | (14)   |
| Children get more shots than are good for them                                                     |       |        |
| 1 = Strongly Agree                                                                                 | 36    | (7.2)  |
| 2 = Agree                                                                                          | 18    | (3.6)  |
| 3 = Not sure                                                                                       | 41    | (8.2)  |
| 4 = Disagree                                                                                       | 71    | (14)   |
| 5 = Strongly Disagree                                                                              | 335   | (67)   |
| I believe that many of the illnesses shots prevent are severe                                      |       |        |
| 1 = Strongly Agree                                                                                 | 404   | (81)   |
| 2 = Agree                                                                                          | 61    | (12)   |
| 3 = Not sure                                                                                       | 10    | (2)    |
| 4 = Disagree                                                                                       | 8     | (1.6)  |
| 5 = Strongly Disagree                                                                              | 18    | (3.6)  |
| It is better for my child to develop immunity by getting sick than to get a shot                   |       |        |
| 1 = Strongly Agree                                                                                 | 8     | (1.6)  |
| 2 = Agree                                                                                          | 4     | (0.8)  |
| 3 = Not sure                                                                                       | 10    | (2)    |
| 4 = Disagree                                                                                       | 57    | (11)   |

|                                                                                                                             |     |       |
|-----------------------------------------------------------------------------------------------------------------------------|-----|-------|
| 5 = Strongly Disagree                                                                                                       | 422 | (84)  |
| It is better for children to get fewer vaccines at the same time                                                            |     |       |
| 1 = Strongly Agree                                                                                                          | 62  | (12)  |
| 2 = Agree                                                                                                                   | 78  | (16)  |
| 3 = Not sure                                                                                                                | 131 | (26)  |
| 4 = Disagree                                                                                                                | 67  | (13)  |
| 5 = Strongly Disagree                                                                                                       | 163 | (33)  |
| How concerned are you that your child might have a serious side effect from a shot?                                         |     |       |
| 1 = Not at all concerned                                                                                                    | 62  | (12)  |
| 2 = Not too concerned                                                                                                       | 122 | (24)  |
| 3 = Not sure                                                                                                                | 49  | (9.8) |
| 4 = Somewhat concerned                                                                                                      | 138 | (28)  |
| 5 = Very concerned                                                                                                          | 130 | (26)  |
| How concerned are you that any one of the childhood shots might not be safe?                                                |     |       |
| 1 = Not at all concerned                                                                                                    | 166 | (33)  |
| 2 = Not too concerned                                                                                                       | 109 | (22)  |
| 3 = Not sure                                                                                                                | 56  | (11)  |
| 4 = Somewhat concerned                                                                                                      | 81  | (16)  |
| 5 = Very concerned                                                                                                          | 89  | (18)  |
| How concerned are you that a shot might not prevent the disease?                                                            |     |       |
| 1 = Not at all concerned                                                                                                    | 142 | (28)  |
| 2 = Not too concerned                                                                                                       | 108 | (22)  |
| 3 = Not sure                                                                                                                | 55  | (11)  |
| 4 = Somewhat concerned                                                                                                      | 79  | (16)  |
| 5 = Very concerned                                                                                                          | 117 | (23)  |
| I trust the information I receive about shots                                                                               |     |       |
| 1 = Strongly Agree                                                                                                          | 259 | (52)  |
| 2 = Agree                                                                                                                   | 163 | (33)  |
| 3 = Not sure                                                                                                                | 52  | (10)  |
| 4 = Disagree                                                                                                                | 16  | (3.2) |
| 5 = Strongly Disagree                                                                                                       | 11  | (2.2) |
| I am able to openly discuss my concerns about shots with my child's doctor                                                  |     |       |
| 1 = Strongly Agree                                                                                                          | 299 | (60)  |
| 2 = Agree                                                                                                                   | 127 | (25)  |
| 3 = Not sure                                                                                                                | 29  | (5.8) |
| 4 = Disagree                                                                                                                | 6   | (1.2) |
| 5 = Strongly Disagree                                                                                                       | 40  | (8)   |
| All things considered, how much do you trust your child's doctor?                                                           |     |       |
| 0 = Do not trust at all                                                                                                     | 0   | (0)   |
| 1-5                                                                                                                         | 28  | (5.6) |
| 6                                                                                                                           | 5   | (1)   |
| 7                                                                                                                           | 17  | (3.4) |
| 8                                                                                                                           | 65  | (13)  |
| 9                                                                                                                           | 100 | (20)  |
| 10 = Completely trust                                                                                                       | 286 | (57)  |
| Would you have your children vaccinated with a vaccine reported effective against COVID-19 and approved by the authorities? |     |       |
| Yes                                                                                                                         | 458 | (91)  |
| No                                                                                                                          | 20  | (4)   |

|                                                                                                                           |     |       |
|---------------------------------------------------------------------------------------------------------------------------|-----|-------|
| Don't Know                                                                                                                | 23  | (4.6) |
| <hr/>                                                                                                                     |     |       |
| Would you have yourself vaccinated with a vaccine reported effective<br>against COVID-19 and approved by the authorities? |     |       |
| Yes                                                                                                                       | 469 | (94)  |
| No                                                                                                                        | 18  | (3.6) |
| Don't Know                                                                                                                | 14  | (2.8) |
| <hr/>                                                                                                                     |     |       |
